# Supplementary material for: Analysis of wild and farmed salmon using13C solid-state NMR and MRI directly on fillet tissue
Source: Royal Society of Chemistry journal article supplement (doi:10.1039/c6ay03000a), 2017-01-01
Supplement: c6ay03000a1.pdf [file c6ay03000a1.pdf]

**Supporting Information for**  
**Analysis of wild and farmed salmon using  $^{13}\text{C}$  solid-**  
**state NMR and MRI directly on fillet tissue**

**Christian Totland<sup>a\*</sup>, John Georg Seland<sup>a</sup>, Signe Steinkopf<sup>b</sup>, Willy Nerdal<sup>a</sup>**

<sup>a</sup>Department of Chemistry, University of Bergen, Norway

<sup>b</sup>Department of Biomedical Laboratory, Sciences and Chemical Engineering, Bergen University  
College, Norway

\*Corresponding Author:

Email: [christian.totland@uib.no](mailto:christian.totland@uib.no)

Phone: +47 55588233

**This PDF includes:**

$^{13}\text{C}$   $T_1$  values and shift assignments

Additional  $^{13}\text{C}$  MAS NMR spectra

$^1\text{H}$   $T_1$  values and spectra

F- and T-tests

## $^{13}\text{C}$ $T_1$ values and shift assignments

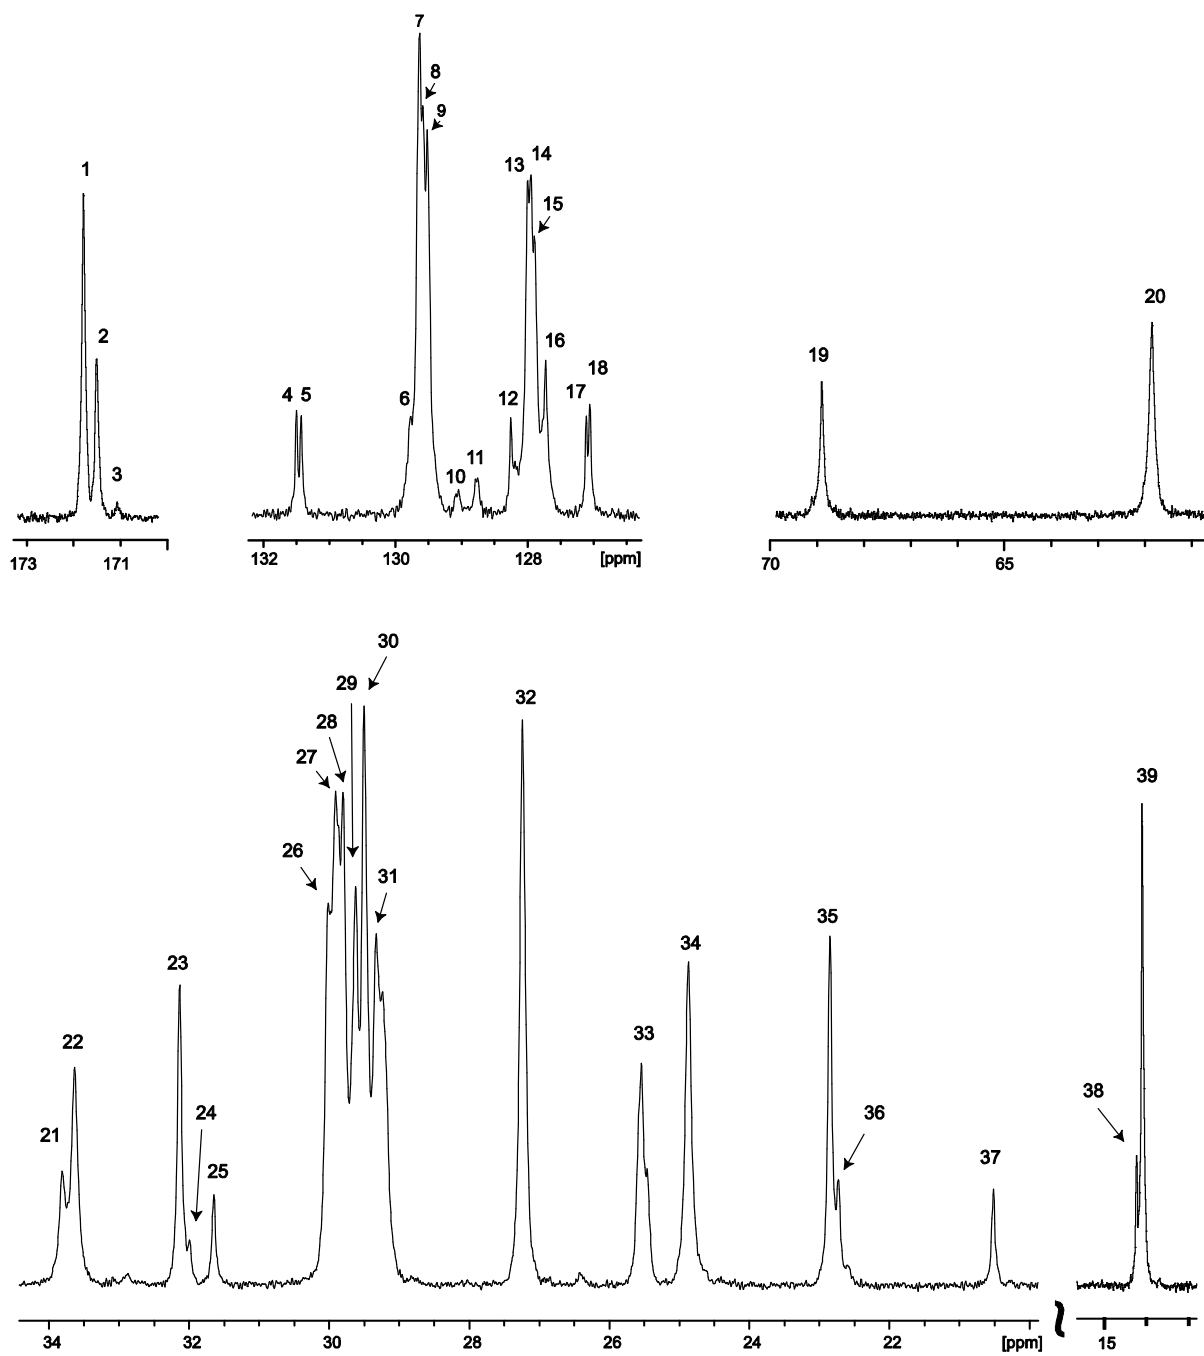

**Figure S1.**  $^{13}\text{C}$  MAS spectrum of farmed salmon #1, labelled numerical in accordance with Table S1.

**Table S1.**  $^{13}\text{C}$   $T_1$  and Chemical Shift Assignments of MAS spectra of regular farmed salmon. Assignments based on (M. Aursand & Grasdalen, 1992) and (M. Aursand, Rainuzzo, & Grasdalen, 1993).

| Number | Description                                                   | Carbon                                                                                                                   | $T_1$ (sec)<br>Farmed<br>Salmon | $T_1$ (sec)<br>Wild<br>Salmon |
|--------|---------------------------------------------------------------|--------------------------------------------------------------------------------------------------------------------------|---------------------------------|-------------------------------|
| 1      | Carbonyl $\alpha/\gamma$                                      | $\text{C}_{\alpha/\gamma}=\text{O}$                                                                                      | 4.1                             | 2.1                           |
| 2      | Carbonyl $\beta$                                              | $\text{C}_{\beta}=\text{O}$                                                                                              | 3.3                             | 1.6                           |
| 3      | Carbonyl $\beta$ w/DHA                                        | $\text{C}_{\beta}=\text{O}$                                                                                              | -                               | 2.2                           |
| 4      | EPA $\text{C}_{18}$ / DHA $\text{C}_{20}$                     | $-\text{C}=\text{C}-$                                                                                                    | 4.9                             | 5.2                           |
| 5      | ALA $\text{C}_{16}$                                           | $-\text{C}=\text{C}-$                                                                                                    | 3.8                             | x                             |
| 6      | 18:2 n-6 $\text{C}_{13}$                                      | $-\text{C}=\text{C}-$                                                                                                    | -                               | -*                            |
| 7      | $\omega 9$ 20:1, $\text{C}_{11-12}$ + 22:1 $\text{C}_{13-14}$ | $-\text{C}=\text{C}-$                                                                                                    | 2.8                             | 1.1*                          |
| 8      | $\omega 7$ 16:1 $\text{C}_9$                                  | $-\text{C}=\text{C}-$                                                                                                    | -                               | -                             |
| 9      | $\omega 9$ 18:1 $\text{C}_9$                                  | $-\text{C}=\text{C}-$                                                                                                    | 2.5                             | -*                            |
| 10     | DHA $\text{C}_5$                                              | $-\text{C}=\text{C}-$                                                                                                    | 2.3                             | 1.0                           |
| 11     | EPA $\text{C}_{5-6}$                                          | $-\text{C}=\text{C}-$                                                                                                    | 2.1                             | 1.3                           |
| 12     | Highly unsaturated f.a.                                       | $-\text{C}=\text{C}-$                                                                                                    | 4.3                             | 2.7                           |
| 13     | Polyunsaturated f.a.                                          | $-\text{C}=\text{C}-$                                                                                                    | 4.3                             | 2.0                           |
| 14     | Polyunsaturated f.a.                                          | $-\text{C}=\text{C}-$                                                                                                    | 4.0                             | 2.0                           |
| 15     | 18:2 n-6                                                      | $-\text{C}=\text{C}-$                                                                                                    | -                               | -                             |
| 16     | Not identified                                                | $-\text{C}=\text{C}-$                                                                                                    | -                               | 2.4                           |
| 17     | EPA $\text{C}_{17}$ / DHA $\text{C}_{19}$                     | $-\text{C}=\text{C}-$                                                                                                    | -                               | 4.9                           |
| 18     | $\text{C}_{15}$ – ALA                                         | $-\text{C}=\text{C}-$                                                                                                    | 8.0                             | X                             |
| 19     | All f.a.                                                      | $(\text{C}_{\alpha}\text{O})-(\text{C}_{\beta}\text{O})-(\text{C}_{\gamma}\text{O})$                                     | 0.74                            | 0.45                          |
| 20     | All f.a.                                                      | $(\underline{\text{C}}_{\alpha}\text{O})-(\underline{\text{C}}_{\beta}\text{O})-(\underline{\text{C}}_{\gamma}\text{O})$ | 0.48                            | 0.25                          |
| 21     | All f.a.                                                      | $\text{O}=\text{C}-\text{CH}_2-$                                                                                         | 0.99                            | 0.51                          |
| 22     | All f.a.                                                      | $\text{O}=\text{C}-\text{CH}_2-$                                                                                         | 1.08                            | 0.54                          |
| 23     | Monounsaturated/saturated f.a.                                | $\underline{\text{C}}\text{H}_2-\text{CH}_2-\text{CH}_3$                                                                 | 4.14                            | 1.9                           |
| 25     | 18:2 n-6                                                      | $\underline{\text{C}}\text{H}_2-\text{CH}_2-\text{CH}_3$                                                                 | -                               | -                             |
| 26     | f.a.                                                          | $-\text{CH}_2-\underline{\text{C}}\text{H}_2-\text{CH}_2-$                                                               | 2.0                             | 1.1**                         |
| 27     | f.a.                                                          | $-\text{CH}_2-\underline{\text{C}}\text{H}_2-\text{CH}_2-$                                                               | 1.7                             | 0.75**                        |
| 28     | f.a.                                                          | $-\text{CH}_2-\underline{\text{C}}\text{H}_2-\text{CH}_2-$                                                               | 2.0                             | 1.1**                         |
| 29     | f.a.                                                          | $-\text{CH}_2-\underline{\text{C}}\text{H}_2-\text{CH}_2-$                                                               | 2.3                             | -**                           |
| 30     | f.a.                                                          | $-\text{CH}_2-\underline{\text{C}}\text{H}_2-\text{CH}_2-$                                                               | 1.5                             | 0.67**                        |
| 31     | f.a.                                                          | $-\text{CH}_2-\underline{\text{C}}\text{H}_2-\text{CH}_2-$                                                               | -                               | -**                           |
| 32     | Mono, di and 18:3                                             | $-\underline{\text{C}}\text{H}_2-\text{CH}=\text{C}$                                                                     | 2.2                             | 0.87                          |
| 33     | Unsaturated f.a.                                              | $=\text{CH}-\underline{\text{C}}\text{H}_2-\text{CH}=\text{C}$                                                           | 4.6                             | 1.9                           |
| 34     | $\text{C}_3$ – All F.a. except 22:6                           | $-\text{CH}_2-$                                                                                                          | 1.4                             | 0.68                          |
| 35     | All f.a.                                                      | $-\underline{\text{C}}\text{H}_2-\text{CH}_3$                                                                            | 6.1                             | 3.2                           |
| 36     | DHA $\text{C}_3$                                              | $-\underline{\text{C}}\text{H}_2-\text{CH}_3$                                                                            | -                               | -                             |
| 37     | All n-3 f.a.                                                  | $-\underline{\text{C}}\text{H}_2-\text{CH}_3$                                                                            | 9.8                             | 2.33                          |
| 38     | Methyl $\omega 3$                                             | $-\text{CH}_3$                                                                                                           | -                               | -                             |
| 39     | Methyl                                                        | $-\text{CH}_3$                                                                                                           | 7.5                             | 9.5                           |

\*Indistinguishable in wild salmon due to low occurrence

\*\*This spectral region is quite different for farmed and wild salmon, and values are not directly comparable

**Table S2.** Omega-3 fatty acids analyzed in this study, with carbon resonances assigned in Figure 2 indicated in the molecular structures.

| Fatty acid                                             | Molecular Structure |
|--------------------------------------------------------|---------------------|
| $\omega$ -3 (DHA),<br>docosahexaenoic acid,<br>(22:6)  |                     |
| $\omega$ -3 (EPA),<br>eicosapentaenoic acid,<br>(20:5) |                     |
| $\omega$ -3 (ALA), $\alpha$ -linolenic<br>acid, (18:3) |                     |

### Additional $^{13}\text{C}$ MAS NMR spectra

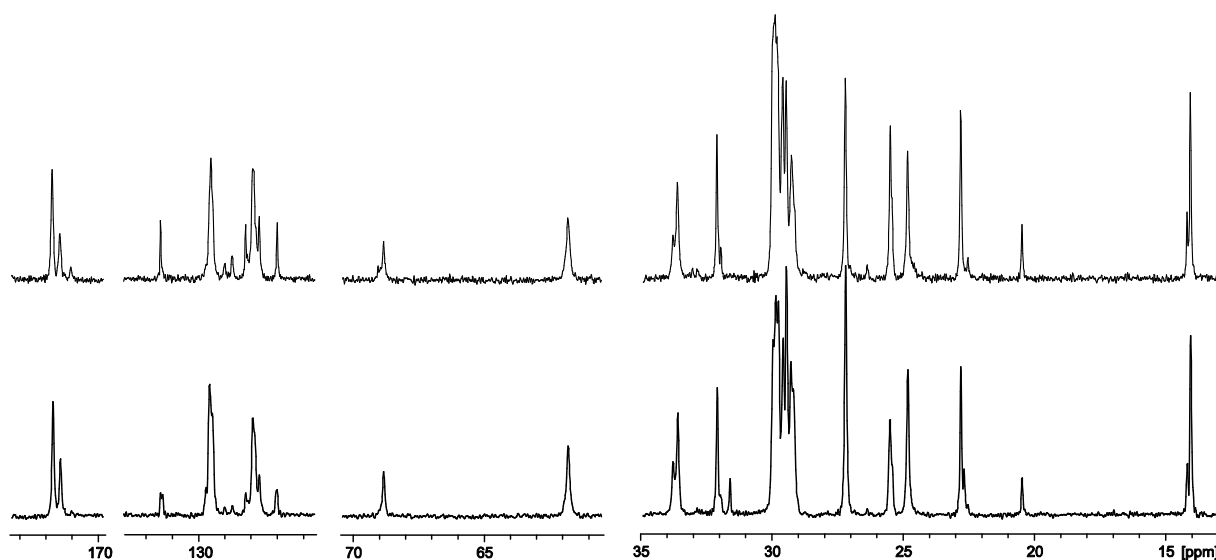

**Figure S2.** Spectra of farmed (bottom) and wild (top) salmon recorded with 256 transients, relaxation delay of 10 seconds, 50 msec acquisition time and high-power proton decoupling. The total experiment time is 20 minutes.

## <sup>1</sup>H T<sub>1</sub> values and spectra

**Table S3.** <sup>1</sup>H T<sub>1</sub> values and shift assignments of MAS spectra (Figure S3)

| Number | Description                    | Carbon                                 | T <sub>1</sub> (sec)<br>Farmed<br>Salmon | T <sub>1</sub> (sec)<br>Wild<br>Salmon |
|--------|--------------------------------|----------------------------------------|------------------------------------------|----------------------------------------|
| 1      | Unsaturated f.a.               | -CH=CH-                                | 0.91                                     | 0.91                                   |
| 2      | water                          |                                        | 1.08                                     | 0.69                                   |
| 3      | glyceryl                       | -CH <sub>2</sub> -O-                   | 0.69                                     | 0.72                                   |
| 4      | glyceryl                       | -CH <sub>2</sub> -O-                   | 0.71                                     | 0.71                                   |
| 5      | Polyunsaturated f.a.           | =CH-CH <sub>2</sub> -CH=               | 0.62                                     | 0.66                                   |
| 6      | All F.a. except 22:6           | O=C-CH <sub>2</sub> -CH <sub>2</sub> - | 0.58                                     | 0.58                                   |
| 7      | Unsaturated f.a.               | -CH <sub>2</sub> -CH=CH-               | 0.57                                     | 0.58                                   |
| 8      | All f.a. except DHA            | O=C-CH <sub>2</sub> -CH <sub>2</sub> - | 0.53                                     | 0.53                                   |
| 9      | All f.a. except EPA<br>and DHA | -CH <sub>2</sub> -                     | 0.55                                     | 0.54                                   |
| 10     | All f.a.                       | -CH <sub>3</sub>                       | 0.86                                     | 0.88                                   |

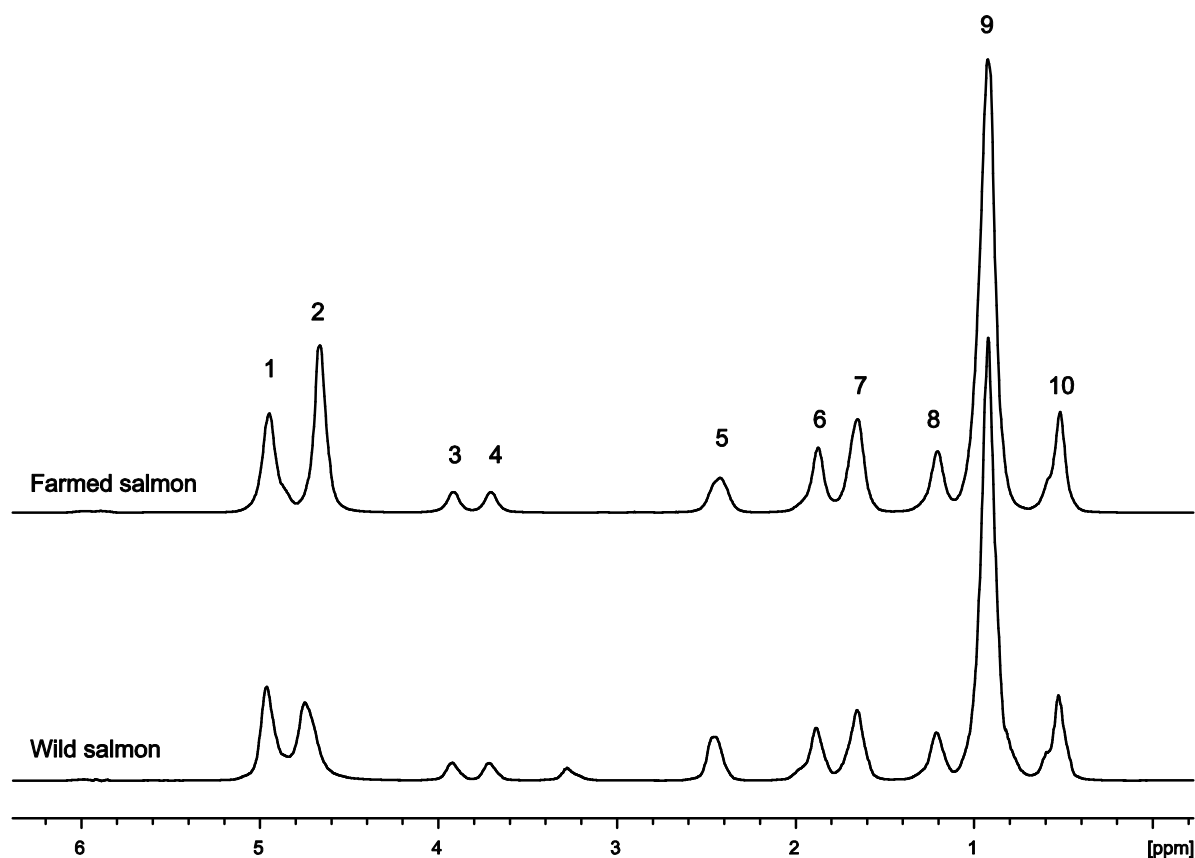

**Figure S3.** <sup>1</sup>H MAS spectra (2.5 kHz) of farmed and wild salmon. Assignments of the numbered peaks are in Table S2.

The similarity of the  $^1\text{H}$   $T_1$  values for farmed and wild salmon is due to molecular dynamics in the spin-diffusion regime of lipids in the adipose tissue. Hence, the values are less suited than the  $^{13}\text{C}$   $T_1$  values to evaluate the chemical environment and mobility of the lipids.

### **F- and T-test**

**Table S4.** All the statistic tests were carried out by comparing the contents of each type of fatty acid in two groups (farmed and wild salmon) at a significance level of 5%. The tests with corresponding p-values are listed in the table.

| <b>Fatty acid</b> | <b>F-test</b> | <b>T-test</b>           |
|-------------------|---------------|-------------------------|
| Total n-3         | p=0,15        | p=0,38                  |
| ALA               | *             | p=1,02*10 <sup>-7</sup> |
| DHA               | p=0,35        | p=2,5*10 <sup>-6</sup>  |
| EPA               | p=0,16        | p=2,1*10 <sup>-6</sup>  |
| n-6               | *             | 1,76*10 <sup>-7</sup>   |

*\* It was not possible to perform F-tests for the variances of the fatty acid contents of ALA and n-6, since these fatty acids were not detected in wild salmon. In these t-tests, it was assumed that the variance of the measurements were similar in farmed and wild salmon.*

The F-tests showed that there were no difference in variances of measurements carried out in farmed and in wild salmon, which is indicated by p-values  $> \alpha = 0.05$ . Since the variances were equal in both groups (farmed and wild salmon) the t-tests with assumed equal variances were carried out. The t-tests were used to test if the differences in the fatty acid contents in farmed and wild salmon are significant.

The results of the t-tests shows that the total content of n-3 is similar in farmed and in wild salmon (p = 0.38). The other p-values from the t-tests show that there are significant differences in the fatty acid contents in farmed and wild salmon.

ALA and n-6 are only found in farmed salmon with p-values of  $1.02 * 10^{-7}$  and  $1.76 * 10^{-7}$ , respectively. Furthermore, t-tests on the contents of DHA and EPA differs significantly from farmed and wild salmon with p-values of  $2.5 * 10^{-6}$  (DHA) and  $2.1 * 10^{-6}$ (EPA).
